# Supplementary material for: Daily Variation in Nursing Home Staffing and Its Association With Quality Measures
Source: PubMed Central journal article supplement (PMC9907340; doi:10.1001/jamanetworkopen.2022.2051), 2022-03-14
Supplement: jamanetwopen-e222051-s001.pdf [file jamanetwopen-e222051-s001.pdf]

## Supplemental Online Content

Mukamel DB, Saliba D, Ladd H, Konetzka RT. Daily variation in nursing home staffing and its association with quality measures. *JAMA Netw Open*. 2022;5(3):e222051.  
doi:10.1001/jamanetworkopen.2022.2051

**eTable 1.** Characteristics of Nursing Homes Associated With Daily Variation Measures  
Sensitivity Analysis: Total Outlier Days/Low Outliers Days at Threshold of 30%

**eTable 2.** Weighted  $\kappa$  Statistic for Agreement Between Mean Staffing and Daily Staffing  
Variation: Sensitivity Analysis With Measures Based on 30% Threshold

**eTable 3.** Characteristics of Nursing Homes Associated with CMS 5-Star Ranking: Staffing  
Sensitivity Analysis

This supplemental material has been provided by the authors to give readers additional information about their work.

| <b>eTable 1. Characteristics of Nursing Homes Associated With Daily Variation Measures Sensitivity Analysis:<br/>Total Outlier Days/Low Outliers Days at Threshold of 30%</b> |                                                          |                                                           |                                                          |                                                           |
|-------------------------------------------------------------------------------------------------------------------------------------------------------------------------------|----------------------------------------------------------|-----------------------------------------------------------|----------------------------------------------------------|-----------------------------------------------------------|
| <b>Independent<br/>Variables</b>                                                                                                                                              | <b>Total Outlier Days</b>                                |                                                           | <b>Low Outlier Days</b>                                  |                                                           |
|                                                                                                                                                                               | <b>RNs Daily<br/>Staffing<br/>Variation<br/>Measures</b> | <b>CNAs Daily<br/>Staffing<br/>Variation<br/>Measures</b> | <b>RNs Daily<br/>Staffing<br/>Variation<br/>Measures</b> | <b>CNAs Daily<br/>Staffing<br/>Variation<br/>Measures</b> |
| CMS 5-Star, Quality                                                                                                                                                           | -4.37<br><0.001                                          | -1.25<br><0.001                                           | -2.70<br><0.001                                          | -0.66<br><0.001                                           |
| CMS 5-Star, Survey                                                                                                                                                            | -5.77<br><0.001                                          | -1.91<br><0.001                                           | -3.23<br><0.001                                          | -0.89<br><0.001                                           |
| Average case mix<br>(RUGS IV)                                                                                                                                                 | -4.32<br><0.001                                          | -0.21<br>0.344                                            | -2.64<br><0.001                                          | -0.16<br>0.232                                            |
| <b>Payers:</b>                                                                                                                                                                |                                                          |                                                           |                                                          |                                                           |
| <b>Medicaid (Reference)</b>                                                                                                                                                   |                                                          |                                                           |                                                          |                                                           |
| Percent Medicare<br>patients                                                                                                                                                  | -6.29<br><0.001                                          | 0.81<br><0.001                                            | -3.73<br><0.001                                          | 0.31<br>0.004                                             |
| Percent other payers                                                                                                                                                          | -3.33<br><0.001                                          | 0.48<br>0.021                                             | -1.96<br><0.001                                          | 0.13<br>0.279                                             |
| Nursing Home is part of<br>a chain                                                                                                                                            | -6.38<br><0.001                                          | -2.41<br><0.001                                           | -3.72<br><0.001                                          | -1.16<br><0.001                                           |
| <b>Ownership:</b>                                                                                                                                                             |                                                          |                                                           |                                                          |                                                           |
| <b>For profit (Reference)</b>                                                                                                                                                 |                                                          |                                                           |                                                          |                                                           |
| Nonprofit ownership                                                                                                                                                           | -11.95<br><0.001                                         | -1.40<br>0.009                                            | -6.61<br><0.001                                          | -0.49<br>0.116                                            |
| Government<br>ownership                                                                                                                                                       | -10.38<br><0.001                                         | -2.07<br>0.006                                            | -7.36<br><0.001                                          | -0.81<br>0.062                                            |
| Other ownership                                                                                                                                                               | -6.55<br>0.001                                           | -0.92<br>0.181                                            | -3.58<br>0.008                                           | -0.24<br>0.547                                            |
| Nursing Home is<br>hospital based                                                                                                                                             | -4.62<br>0.435                                           | 0.70<br>0.741                                             | -4.34<br>0.215                                           | 0.81<br>0.513                                             |
| Size: Resident annual<br>average census                                                                                                                                       | -34.20<br><0.001                                         | -10.75<br><0.001                                          | -19.57<br><0.001                                         | -4.72<br><0.001                                           |
| Sample size                                                                                                                                                                   | 23,398                                                   | 23,503                                                    | 23,398                                                   | 23,503                                                    |
| Number of facilities                                                                                                                                                          | 13,295                                                   | 13,339                                                    | 13,295                                                   | 13,339                                                    |

# Note: Coefficients are reported as average marginal effects and all continuous variables are standardized. P values in parentheses.

| <b>eTable 2.</b> Weighted $\kappa$ Statistic for Agreement Between Mean Staffing and Daily Staffing Variation: Sensitivity Analysis With Measures Based on 30% Threshold |                |                |
|--------------------------------------------------------------------------------------------------------------------------------------------------------------------------|----------------|----------------|
|                                                                                                                                                                          | RNs            | CNAs           |
|                                                                                                                                                                          | Weighted Kappa | Weighted Kappa |
| Total Outlier Days (TOD)                                                                                                                                                 | 0.565          | 0.217          |
| Low Outlier Days (LOD)                                                                                                                                                   | 0.530          | 0.226          |

**eTable 3.** Characteristics of Nursing Homes Associated with CMS 5-Star Ranking: Staffing Sensitivity Analysis

| Dependent Variables<br>Independent Variables | Coefficient of Variation (COV) |                              | Total Outlier Days (TOD)    |                              | Low Outlier Days (LOD)      |                              |
|----------------------------------------------|--------------------------------|------------------------------|-----------------------------|------------------------------|-----------------------------|------------------------------|
|                                              | RNs Daily Variation Measure    | CNAs Daily Variation Measure | RNs Daily Variation Measure | CNAs Daily Variation Measure | RNs Daily Variation Measure | CNAs Daily Variation Measure |
| CMS 5-Star ranking, QMs                      | -0.012<br><0.001               | -0.004<br><0.001             | -3.43<br><0.001             | -2.46<br><0.001              | -2.19<br><0.001             | -1.26<br><0.001              |
| CMS 5-Star ranking, Survey                   | -0.019<br><0.001               | -0.006<br><0.001             | -4.22<br><0.001             | -3.98<br><0.001              | -2.40<br><0.001             | -1.89<br><0.001              |
| CMS 5-Star ranking, Staffing                 | -0.090<br><0.001               | -0.006<br>0.219              | -14.44<br><0.001            | -2.06<br><0.001              | -9.67<br><0.000             | -1.07<br><0.001              |
| Average case mix (RUGS IV)                   | -0.027<br><0.001               | -0.002<br>0.014              | -4.44<br><0.001             | -0.70<br>0.040               | -2.78<br><0.001             | -0.41<br>0.027               |
| Payers:                                      |                                |                              |                             |                              |                             |                              |
| Medicaid (Reference)                         |                                |                              |                             |                              |                             |                              |
| Percent Medicare patients                    | -0.012<br><0.001               | 0.004<br>0.001               | -2.54<br><0.001             | 1.74<br><0.001               | -1.32<br><0.001             | 0.80<br><0.001               |
| Percent other payers                         | -0.002<br>0.514                | 0.002<br>0.044               | -1.07<br>0.023              | 1.00<br>0.002                | -0.49<br><0.001             | 0.37<br>0.042                |
| Nursing Home is part of a chain              | -0.020<br>0.010                | -0.008<br><0.001             | -6.08<br><0.001             | -5.28<br><0.001              | -3.43<br><0.001             | -2.51<br><0.001              |
| Ownership:                                   |                                |                              |                             |                              |                             |                              |
| For-Profit (Reference)                       |                                |                              |                             |                              |                             |                              |
| Nonprofit ownership                          | 0.032<br>0.026                 | -0.002<br>0.311              | -2.88<br>0.029              | -4.07<br><0.001              | -0.77<br>0.392              | -2.09<br><0.001              |
| Government ownership                         | 0.003<br>0.794                 | +0.000<br>0.978              | -3.50<br>0.124              | -3.76<br>0.005               | -3.15<br>0.032              | -1.97<br>0.006               |
| Other ownership                              | 0.004<br>0.741                 | -0.003<br>0.226              | -1.62<br>0.377              | -1.42<br>0.237               | -0.31<br>0.809              | -0.77<br>0.209               |
| Nursing Home is hospital based               | -0.035<br>0.158                | 0.002<br>0.771               | -1.52<br>0.785              | 0.32<br>0.926                | -1.97<br>0.578              | 1.40<br>0.511                |
| Size: Resident annual average census         | -0.137<br><0.001               | -0.025<br><0.001             | -29.28<br><0.001            | -22.12<br><0.001             | -18.23<br><0.001            | -10.34<br><0.001             |
| Sample size                                  | 23,398                         | 23,503                       | 23,398                      | 23,503                       | 23,398                      | 23,503                       |
| Number of facilities                         | 13,295                         | 13,339                       | 13,295                      | 13,339                       | 13,295                      | 13,339                       |
